# Supplementary material
Source: PubMed Central journal article supplement (PMC5397214)
Supplement: Supp_Figure1.pdf [file Supp_Figure1.pdf]

## Supplementary Data

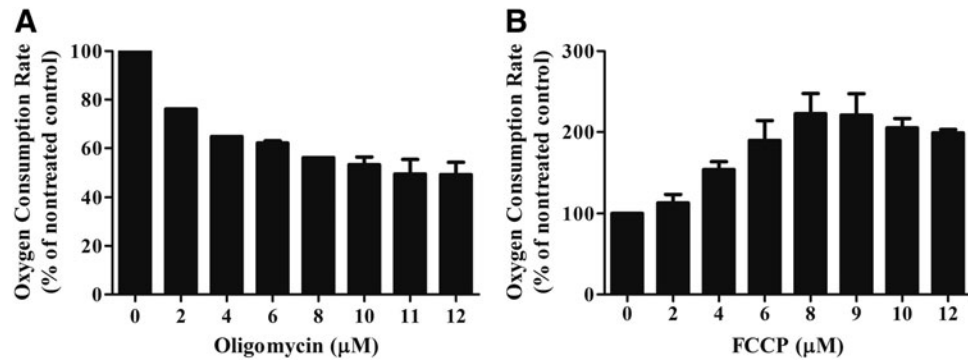

**SUPPLEMENTARY FIG. S1.** Dose titration of oligomycin and FCCP. Oxygen consumption rate is expressed as % of control, which was the nontreated value for human myobundles ( $11.2 \pm 0.9$  pmol/s/ $10^6$  nuclei). **(A)** F1F0 ATP synthase inhibitor oligomycin maximally suppressed respiration at a concentration of 11  $\mu\text{M}$ . **(B)** Uncoupler FCCP maximally increased respiration at a concentration of 8  $\mu\text{M}$ . Each data point represents mean  $\pm$  SEM measured in duplicate of three independent experiments.
