# Supplementary material
Source: PubMed Central journal article supplement (PMC5397214)
Supplement: Supp_Figure2.pdf [file Supp_Figure2.pdf]

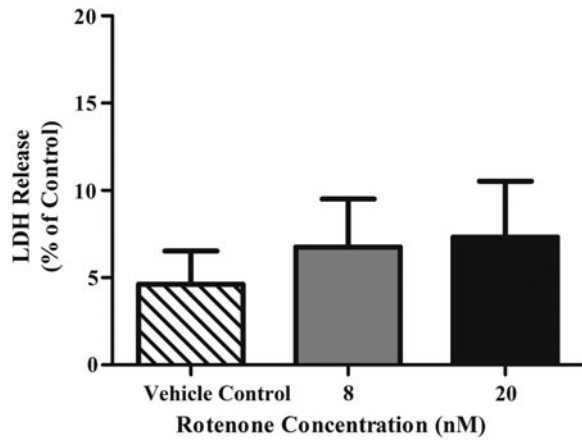

**SUPPLEMENTARY FIG. S2.** Alterations in BHI and fatigue are not due to cytotoxicity. Myobundle LDH release into media compared to a lysed control condition after a 30-min treatment with rotenone. Each data point represents mean  $\pm$  SEM measured in duplicate of three separate donors. BHI, bioenergetic health index; LDH, lactate dehydrogenase.
